# Supplementary material for: Barriers and Implementation strategies for Physical Activity on Prescription (PAP): Healthcare personnel and Management Perspectives in Sweden—An Explanatory Sequential Study Design
Source: Research Square preprint supplement (doi:10.21203/rs.3.rs-6869061/v1), 2025-06-27
Supplement: Supplementary file 1 [file 11773232a0cfb3406f7b598f.docx]

**Additional file 7. Self-reported competence, and documentation habits according to classification of health care interventions codes [KVÅ].** *Physiotherapists (n=27) Versus Other Healthcare Personnel (n=47)*

| **Profession (n=74)** | | **n (%)** | | | **n (%)** | |  | | **P-value**  (Fisher’s Exact test) | |
| --- | --- | --- | --- | --- | --- | --- | --- | --- | --- | --- |
|  | | Very high/High | | | Low/Very low | |  | |  | |
| **Competence Counselling** | | | | | | | | | | |
| Physiotherapist | | 27 (100) | | | 0 (-) | |  | | .003 | |
| Other personnel | | 34 (72) | | | 13 (28) | |  | |  | |
| **Competence Qualified counselling** | | | | | | | | | | |
| Physiotherapist | | 20 (74) | | | 7 (26) | |  | | .004 | |
| Other personnel | | 18 (38) | | | 29 (62) | |  | |  | |
| **Competence Prescribing PAP** | | | | | | | | | | |
| Physiotherapist | | 20 (74) | | | 7 (26) | |  | | .003 | |
| Other personnel | | 17 (36) | | | 30 (64) | |  | |  | |
| **Competence Follow-up PAP Prescription** | | | | | | | | | | |
| Physiotherapist | | 21 (78) | | | 6 (22) | |  | | <.001 | |
| Other personnel | | 15 (32) | | | 32 (68) | |  | |  | |
| **Documentation Qualified Cunselling** | | | | | | | | | | |
|  | **n (%)**  Always | | **n (%)**  Often | **n (%)**  Rarely | | **n (%)**  Never | |  | |  |
| Physiotherapist | 2 (7) | | 3 (11) | 11 (41) | | 11 (41) | |  | | .018 |  |
| Other personnel | 1 (2) | | 4 (8) | 7 (15) | | 35 (74) | |  | |  |  |
| **Documentation PAP-prescription** | | | | | | | | | | |  |
| Physiotherapist | 8 (29) | | 3 (11) | 6 (22) | | 10 (37) | |  | | <.001 |  |
| Other personnel | 1 (2) | | 2 (4) | 4 (9) | | 40 (85) | |  | |  |  |
| **Documentation Follow-up on PAP** | | | | | | | | | | |  |
| Physiotherapist | 6 (22) | | 4 (15) | 6 (22) | | 11 (41) | |  | | <.001 |  |
| Other personnel | 1 (2) | | 2 (4) | 3 (6) | | 41 (87) | |  | |  |  |
