# Supplementary material for: Barriers and Implementation strategies for Physical Activity on Prescription (PAP): Healthcare personnel and Management Perspectives in Sweden—An Explanatory Sequential Study Design
Source: Research Square preprint supplement (doi:10.21203/rs.3.rs-6869061/v1), 2025-06-27
Supplement: Supplementary file 2 [file 43d7d3e898bc56807dc0d5cf.docx]

**Additional file 6. Healthcare personnel self-reported competence.**

| **Self-reported competence to give Basic Advice (n=75)** | | |
| --- | --- | --- |
|  | **n** | **%** |
| Very high/High | 50/20 | 67.5/27.0 |
| Low/Very low | 4/0 | 5.4/0 |
| **Self-reported competence to give Counselling (n=75)** | | |
| Very high/High | 30/31 | 40.5/41.8 |
| Low/Very low | 11/2 | 14.9/2.7 |
| **Self-reported competence to provide Qualified Counselling (n=75)** | | |
| Very high/High | 11/27 | 14.9/36.5 |
| Low/Very low | 27/9 | 36.5/12.1 |
| **Self-reported competence to prescribe PAP (n=75)** | | |
| Very high/High | 19/18 | 25.6/24.3 |
| Low/Very low | 16/21 | 21.6/28.3 |
| **Self-reported competence to Follow-Up on prescribed PAP (n=75)** | | |
| Very high/High | 19/17 | 25.6/22.9 |
| Low/Very low | 16/22 | 21.6/29.7 |
