# Supplementary material for: Barriers and Implementation strategies for Physical Activity on Prescription (PAP): Healthcare personnel and Management Perspectives in Sweden—An Explanatory Sequential Study Design
Source: Research Square preprint supplement (doi:10.21203/rs.3.rs-6869061/v1), 2025-06-27
Supplement: Supplementary file 4 [file 8641e004ae67e8919b1caa99.docx]

**Additional file 8. How interview comments was sorted into the domains of the normalization process theory (NPT).**

| **Domain of NPT** | | **Example of comments provided by healthcare personnel (n=9) and managers (n=5)** | |
| --- | --- | --- | --- |
| Coherence | *”Don’t think we should be doing that, evidence is lacking.” (Healthcare personnel)*  *”Doubtful that the patient will follow exercise recommendations better just because it is written/called PAP.” (Manager)* |
| Cognitive participation | *”Comes back to the same point. I advise on exercise programs daily, so why should I do that on PAP instead when there’s no purpose to it?” (Healthcare personnel)*  *”Unfortunately, I haven’t focused on this as much as I should have.” (Manager)* |
| Collective action | *“At our workplace, it's only us physiotherapists who prescribe PAP, due to a lack of knowledge and time among other professional groups” (Healthcare personnel)*  *"Unfortunately, it's difficult with a lot of temporary staffing and lack of continuity. There's a lot that needs to be included in introductions and the like." (Manager)* |
| Reflexive monitoring | *"Even IF PAP had better evidence, the number of prescribed PAP is a poor metric for follow-up — because what would be an appropriate level then? And why is the goal to increase it? Maybe too many PAP are being written, maybe it should decrease? But there's no way to know!" (Healthcare personnel)*  *"I have no clear opinion because I’ve assumed it’s an implemented way of working. I’ve therefore taken for granted that it’s being used." (Manager)* |
