# Supplementary material for: Barriers and Implementation strategies for Physical Activity on Prescription (PAP): Healthcare personnel and Management Perspectives in Sweden—An Explanatory Sequential Study Design
Source: Research Square preprint supplement (doi:10.21203/rs.3.rs-6869061/v1), 2025-06-27
Supplement: Supplementary file 6 [file ab450d75cf878b5d3e4470ff.docx]

**Additional file 5. Frequency of providing physical activity (PA) advice, counselling, and prescription of physical activity (PAP) by background characteristics.**

| **Background** | **A few times per year/never** | **Regularly (Daily/weekly/monthly)** | **P-value (Fisher’s exact test)** |
| --- | --- | --- | --- |
| **Provide Basic Advice on Physical Activity** | | | |
| Gender | | | |
| Female (n=61) | 8 (13%) | 53 (87%) | 3.44 |
| Male (n=11) | 0 (0%) | 11 (100%) |
| Age | | | |
| 20–35 (n=14) | 4 (29%) | 10 (71%) | .036 |
| 36+ (n=61) | 4 (7%) | 57 (93%) |
| Year in profession | | | |
| -10 (n=24) | 5 (21%) | 19 (79%) | .101 |
| 10+ (n=51) | 3 (6%) | 48 (94%) |
| Profession | | | |
| Physiotherapist (n=27) | 1 (4%) | 26 (96%) | .245 |
| Other personnel (n=48) | 7 (15%) | 41 (85%) |
| **Provide Counselling on Physical Activity** | | | |
| Gender | | | |
| Female (n=59) | 12 (20%) | 47 (80%) | 1.0 |
| Male (n=10) | 2 (20%) | 8 (80%) |
| Age | | | |
| 20–35 (n=13) | 3 (23%) | 10 (77%) | .708 |
| 36+ (n=59) | 11 (19%) | 48 (81%) |
| Year in profession | | | |
| -10 (n=22) | 5 (23%) | 17 (77%) | .749 |
| 10+ (n=50) | 9 (18%) | 41 (82%) |
| Profession | | | |
| Physiotherapist (n=25) | 4 (16%) | 21 (84%) | .758 |
| Other personnel (n=48) | 10 (21%) | 37 (79%) |
| **Prescription of PAP** | | | |
| Gender | | | |
| Female (n=59) | 51 (86%) | 8 (14%) | 1.0 |
| Male (n=10) | 9 (90%) | 1 (10%) |
| Age | | | |
| 20–35 (n=13) | 8 (62%) | 5 (38%) | .034 |
| 36+ (n=59) | 52 (88%) | 7 (12%) |
| Year in profession | | | |
| -10 (n=22) | 16 (73%) | 6 (27%) | .168 |
| 10+ (n=50) | 44 (88%) | 6 (12%) |
| Profession | | | |
| Physiotherapist (n=27) | 17 (68%) | 8 (32%) | .018 |
| Other personnel (n=48) | 43 (92%) | 4 (8%) |
